# Supplementary material for: Efficacy of a learning trajectory approach compared to a teach-to-target approach for addition and subtraction
Source: Springer Nature journal article supplement (doi:10.1007/s11858-019-01122-z), 2020-01-11
Supplement: 11858_2019_1122_MOESM1_ESM.pdf [file 11858_2019_1122_MOESM1_ESM.pdf]

**Appendix A: Addition and Subtraction Problem Types (Carpenter & Fennema, 1992; adapted from Clements & Sarama, 2014; NGA/CCSSO, 2010).**

|                                                                                                                                        | Unknown                                                                                                                                                                                                 |                                                                                                                                                                                                 |                                                                                                                                                                                                   |
|----------------------------------------------------------------------------------------------------------------------------------------|---------------------------------------------------------------------------------------------------------------------------------------------------------------------------------------------------------|-------------------------------------------------------------------------------------------------------------------------------------------------------------------------------------------------|---------------------------------------------------------------------------------------------------------------------------------------------------------------------------------------------------|
| Situation                                                                                                                              | Start/Part/Smaller                                                                                                                                                                                      | Change/Part/Difference                                                                                                                                                                          | Result/Whole/Larger                                                                                                                                                                               |
| <p><b>Add-To (Join)</b></p> <p>An action of adding increases the number in a set.</p>                                                  | <p><i>Start Unknown</i></p> $\square + 6 = 11$<br>Al had some balls. Then he got 6 more. Now he has 11 balls. How many did he start with?                                                               | <p><i>Change Unknown</i></p> $5 + \square = 11$<br>Al had 5 balls. He bought some more. Now he has 11. How many did he buy?                                                                     | <p><i>Result Unknown</i></p> $5 + 6 = \square$<br>Al had 5 balls and gets 6 more. How many does he have in all?                                                                                   |
| <p><b>Take-From (Separate)</b></p> <p>An action of taking away decreases the number in a set.</p>                                      | <p><i>Start Unknown</i></p> $\square - 5 = 4$<br>Al had some balls. He gave 5 to Barb. Now he has 4. How many did he have to start with?                                                                | <p><i>Change Unknown</i></p> $9 - \square = 4$<br>Al had 9 balls. He gave some to Barb. Now he has 4. How many did he give to Barb?                                                             | <p><i>Result Unknown</i></p> $9 - 5 = \square$<br>Al had 9 balls and gave 5 to Barb. How many does he have left?                                                                                  |
| <p><b>Part-Part-Whole (Put Together/Take Apart)</b></p> <p>Two parts make a whole, but there is no action—the situation is static.</p> | <p><i>Part Unknown</i></p> 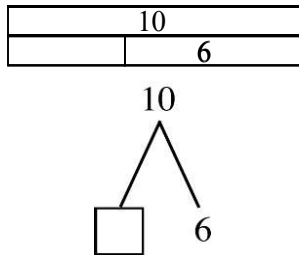 <p>Al has 10 balls. Some are blue, 6 are red. How many are blue?</p>                     | <p><i>Part Unknown</i></p>  <p>Al has 10 balls; 4 are blue and the rest are red. How many are red?</p>      | <p><i>Whole Unknown</i></p>  <p>Al has 4 red balls and 6 blue balls. How many balls does he have in all?</p> |
| <p><b>Compare</b></p> <p>The numbers of objects in two sets are compared.</p>                                                          | <p><i>Smaller Unknown</i></p>  <p>Al has 7 balls. Barb has 2 fewer balls than Al. How many balls does Barb have?</p> | <p><i>Difference Unknown</i></p>  <p>Al has 7 blocks. Barb has 5. How many more does Al have than Barb?</p> | <p><i>Unknown</i></p>  <p>Al has 5 marbles. Barb has 2 more than Al. How many balls does Barb have?</p>      |

**References**

- Carpenter, T. P., & Fennema, E. H. (1992). Cognitively guided instruction: Building on the knowledge of students and teachers. *International Journal of Educational Research*, *17*(5), 457–457. doi:10.1016/S0883-0355(05)80005-9
- Clements, D. H., & Sarama, J. (2014). *Learning and teaching early math: The learning trajectories approach* (2nd ed.). New York, NY: Routledge. doi:10.4324/9780203520574
- NGA/CCSSO. (2010). *Common core state standards*. Washington, DC: National Governors Association Center for Best Practices, Council of Chief State School Officers.

**Appendix B: Skip Condition Children’s Pretest and Posttest**

**Adding/Subtracting LT Level and Assigned Instruction Plan by Problem**

**Type and Problem Size**

| Child | Adding/Subtracting<br>Pretest LT Level<br>( $x = 0$ ) | Instruction A:<br>Problem Type<br>Problem Size<br>( $n + x$ ) | Instruction B:<br>Problem Type<br>Problem Size<br>( $n + x$ ) | Instruction C:<br>Problem Type<br>Problem Size<br>( $n + x$ ) | Adding/Subtracting<br>Posttest LT Level |
|-------|-------------------------------------------------------|---------------------------------------------------------------|---------------------------------------------------------------|---------------------------------------------------------------|-----------------------------------------|
| 14    | Developing <i>1–Small Number</i> +/-                  | Start/Part Unknown<br>20-100<br>$n + 3$                       | Start/Part Unknown<br>0-20<br>$n + 3$                         | Change/Difference<br>Unknown<br>0-10<br>$n + 2$               | Developing <i>1–Small Number</i> +/-    |
| 15    | Developing <i>1–Small Number</i> +/-                  | Start/Part Unknown<br>20-100<br>$n + 3$                       | Change/Difference<br>Unknown<br>20-100<br>$n + 2$             | Result/Whole Unknown<br>20-100<br>$n + 1$                     | Developing <i>1–Small Number</i> +/-    |
| 16    | 1–Small Number +/-                                    | Start/Part Unknown<br>20-100<br>$n + 3$                       | Change/Difference<br>Unknown<br>20-100<br>$n + 2$             | Result/Whole Unknown<br>20-100<br>$n + 1$                     | Developing <i>1–Small Number</i> +/-    |
| 17    | Developing <i>1–Small Number</i> +/-                  | Start/Part Unknown<br>20-100<br>$n + 3$                       | Start/Part Unknown<br>0-10<br>$n + 3$                         | Change/Difference<br>Unknown<br>20-100<br>$n + 2$             | None                                    |
| 19    | 2–Find Result +/-                                     | Start/Part Unknown<br>20-100<br>$n + 2$                       | Start/Part Unknown<br>0-10<br>$n + 2$                         | Change/Difference<br>Unknown<br>20-100<br>$n + 1$             | Developing 2–Find Result +/-            |
| 20    | None                                                  | Start/Part Unknown<br>20-100<br>$n + 4$                       | Change/Difference<br>Unknown<br>20-100<br>$n + 3$             | Change/Difference<br>Unknown<br>0-10<br>$n + 2$               | None                                    |
| 21    | Developing 2–Find Result +/-                          | Start/Part Unknown<br>20-100<br>$n + 2$                       | Start/Part Unknown<br>20-100<br>$n + 2$                       | Result2Whole<br>Unknown<br>20-100<br>$n + 1$                  | Developing 2–Find Result +/-            |
| 22    | 1–Small Number +/-                                    | Start/Part Unknown<br>20-100<br>$n + 3$                       | Change/Difference<br>Unknown<br>0-10<br>$n + 2$               | Change/Difference<br>Unknown<br>0-10<br>$n + 2$               | Developing <i>1–Small Number</i> +/-    |
| 23    | Developing 2–Find Result +/-                          | Start/Part Unknown<br>20-100<br>$n + 2$                       | Start/Part Unknown<br>20-100<br>$n + 2$                       | Change/Difference<br>Unknown<br>20-100<br>$n + 1$             | 2–Find Result +/-                       |

EFFICACY OF A LEARNING TRAJECTORY FOR ADDITION AND SUBTRACTION

|    |                              |                                         |                                                |                                                |                              |
|----|------------------------------|-----------------------------------------|------------------------------------------------|------------------------------------------------|------------------------------|
| 24 | Developing 2-Find Result +/- | Start/Part Unknown<br>20-100<br>$n + 2$ | Start/Part Unknown<br>0-10<br>$n + 2$          | Change/Difference Unknown<br>0-10<br>$n + 1$   | Developing 2-Find Result +/- |
| 25 | 2-Find Result +/-            | Start/Part Unknown<br>20-100<br>$n + 2$ | Change/Difference Unknown<br>20-100<br>$n + 1$ | Change/Difference Unknown<br>0-10<br>$n + 1$   | Developing 2-Find Result +/- |
| 26 | Developing 2-Find Result +/- | Start/Part Unknown<br>20-100<br>$n + 2$ | Start/Part Unknown<br>0-10<br>$n + 2$          | Change/Difference Unknown<br>20-100<br>$n + 1$ | 1-Small Number +/-           |

---

**Appendix C: Each Child’s Pretest and Posttest LT Levels, Anticipated Level**

**Transition, and Incremental Improvement within Levels**

| Child               | Pretest LT Level                         | Anticipated Posttest LT Level based on Session Performance | Posttest LT Level                        | Level Change* | Incremental Improvement                                                                     |
|---------------------|------------------------------------------|------------------------------------------------------------|------------------------------------------|---------------|---------------------------------------------------------------------------------------------|
| <b>LT Treatment</b> |                                          |                                                            |                                          |               |                                                                                             |
| 1                   | Developing 1–<br><i>Small Number</i> +/- | 5–Part-Whole +/-                                           | Developing 2–<br>Find Result +/-         | +             | 1–Small Number +/-<br>3–Find Change +/-<br>4–Counting Strategies +/-<br>5–Part-Whole +/-    |
| 2                   | Developing 2–<br>Find Result +/-         | 3–Find Change +/-                                          | Developing 2–<br>Find Result +/-         |               | 7–Deriver +/-                                                                               |
| 3                   | None                                     | 2–Find Result +/-                                          | Developing 1–<br><i>Small Number</i> +/- | +             | 1–Small Number +/-                                                                          |
| 4                   | Developing 2–<br>Find Result +/-         | 3–Find Change +/-                                          | Developing 2–<br>Find Result +/-         |               | 3–Find Change +/-                                                                           |
| 5                   | 1–Small Number +/-                       | 6–Numbers-in-Numbers +/-                                   | 1– <i>Small Number</i> +/-               |               | 2–Find Result +/-<br>4–Counting Strategies +/-<br>5–Part Whole +/-                          |
| 6                   | Developing 1–<br><i>Small Number</i> +/- | 3–Find Change +/-                                          | Developing 2–<br>Find Result +/-         | +             | 1–Small Number +/-<br>2–Find Result +/-<br>5–Part-Whole +/-<br>6–Numbers-in-Numbers +/-     |
| 7                   | None                                     | 4–Counting Strategies +/-                                  | Developing 2–<br>Find Result +/-         | ++            | 1–Small Number +/-<br>3–Find Change +/-                                                     |
| 8                   | Developing 2–<br>Find Result +/-         | 3–Find Change +/-                                          | Developing 2–<br>Find Result +/-         |               | 1–Small Number +/-<br>2–Find Result +/-<br>3–Find Change +/-                                |
| 9                   | Developing 2–<br>Find Result +/-         | 8–Problem Solver +/-                                       | Developing 2–<br>Find Result +/-         |               | 3–Find Change +/-<br>5–Part-Whole +/-<br>7–Deriver +/-                                      |
| 10                  | Developing 1–<br><i>Small Number</i> +/- | 5–Part-Whole +/-                                           | Developing 3–<br>Find Change +/-         | ++            | 1–Small Number +/-<br>2–Find Result +/-<br>4–Counting Strategies +/-                        |
| 11                  | 1–Small Number +/-                       | 3–Find Change +/-                                          | 2–Find Result +/-                        | +             | 2–Find Result +/-<br>4–Counting Strategies +/-                                              |
| 12                  | Developing 2–<br>Find Result +/-         | 7–Deriver +/-                                              | Developing 2–<br>Find Result +/-         |               | 3–Find Change +/-<br>4–Counting Strategies +/-<br>6–Numbers-in-Numbers +/-<br>7–Deriver +/- |
| 13                  | Developing 2–<br>Find Result +/-         | 6–Numbers-in-Numbers +/-                                   | Developing 2–<br>Find Result +/-         |               | 3–Find Change +/-<br>7–Deriver +/-                                                          |

EFFICACY OF A LEARNING TRAJECTORY FOR ADDITION AND SUBTRACTION

| <b>Skip Treatment</b> |                                          |                                          |                                          |     |                                                                                                         |
|-----------------------|------------------------------------------|------------------------------------------|------------------------------------------|-----|---------------------------------------------------------------------------------------------------------|
| 14                    | Developing 1–<br><i>Small Number</i> +/- | Developing 1–<br><i>Small Number</i> +/- | Developing 1–<br><i>Small Number</i> +/- |     | 7–Deriver +/-<br>8–Problem Solver +/-                                                                   |
| 15                    | Developing 1–<br><i>Small Number</i> +/- | Developing 1–<br><i>Small Number</i> +/- | Developing 1–<br><i>Small Number</i> +/- |     | 2–Find Result +/-<br>4–Counting Strategies +/-<br>5–Part-Whole +/-<br>6–Numbers-in-Numbers +/-          |
| 16                    | 1–Small Number +/-                       | 1–Small Number +/-                       | Developing 1–<br><i>Small Number</i> +/- | (–) | 2–Find Result +/-<br>3–Find Change +/-                                                                  |
| 17                    | Developing 1–<br><i>Small Number</i> +/- | Developing 1–<br><i>Small Number</i> +/- | None                                     | (–) | 2–Find Result +/-<br>7–Deriver +/-                                                                      |
| 19                    | 2–Find Result +/-                        | 2–Find Result +/-                        | Developing 2–<br>Find Result +/-         | (–) | 2–Find Result +/-<br>8–Problem Solver +/-                                                               |
| 20                    | None                                     | None                                     | None                                     |     | 5–Part-Whole +/-<br>8–Problem Solver +/-                                                                |
| 21                    | Developing 2–<br>Find Result +/-         | Developing 2–<br>Find Result +/-         | Developing 2–<br>Find Result +/-         |     | 2–Find Result +/-<br>7–Deriver +/-                                                                      |
| 22                    | 1–Small Number +/-                       | 1–Small Number +/-                       | Developing 1–<br><i>Small Number</i> +/- | (–) | 1–Small Number +/-<br>2–Find Result +/-                                                                 |
| 23                    | Developing 2–<br>Find Result +/-         | Developing 2–<br>Find Result +/-         | 2–Find Result +/-                        | (+) | 2–Find Result +/-<br>3–Find Change +/-<br>5–Part-Whole +/-<br>6–Numbers-in-Numbers +/-<br>7–Deriver +/- |
| 24                    | Developing 2–<br>Find Result +/-         | Developing 2–<br>Find Result +/-         | Developing 2–<br>Find Result +/-         |     | 4–Counting Strategies +/-<br>5–Part-Whole +/-                                                           |
| 25                    | 2–Find Result +/-                        | 2–Find Result +/-                        | Developing 2–<br>Find Result +/-         | (–) | 2–Find Result +/-<br>3–Find Change +/-<br>4–Counting Strategies +/-                                     |
| 26                    | Developing 2–<br>Find Result +/-         | Developing 2–<br>Find Result +/-         | Developing 1–<br><i>Small Number</i> +/- | –   | 5–Part-Whole +/-                                                                                        |

\* + indicates level increase; – indicates level decrease; (–) indicates partial level decrease.

**Appendix D: Adding/Subtracting LT levels for Pretest, Each Instructional Session, and the Posttest, for the LT Group, Separated by Amount of Level Change (note that some children participated in 9 or 10 sessions)**

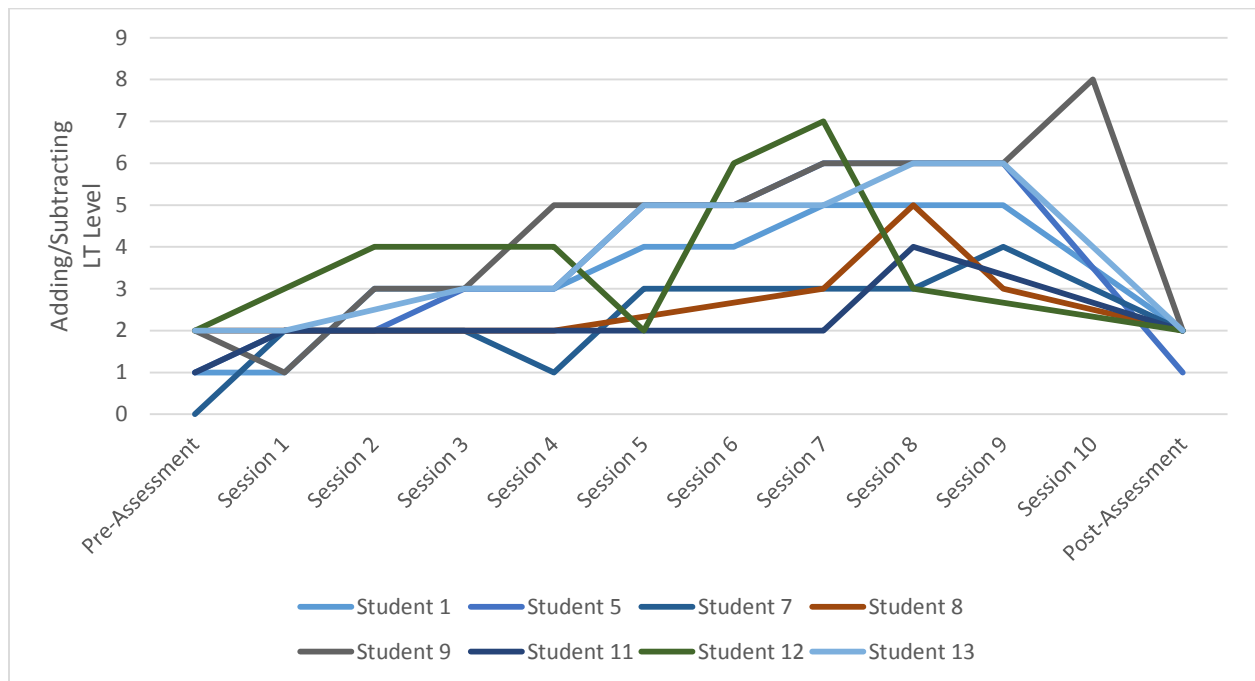

*Figure D-1.* For children who advanced at least 3 levels at some point in instruction, Adding/Subtracting LT levels for Pretest, Each Instructional Session, and the Posttest, for the LT Group (note that some children participated in 9 or 10 sessions). Levels, defined in Figure 1, are 1–Small Number +/-, 2–Find Result +/-, 3–Find Change +/-, 4–Counting Strategies +/-, 5–Part-Whole +/-, 6–Numbers-in-Numbers +/-, 7–Deriver +/-, and 8–Problem Solver +/-.

EFFICACY OF A LEARNING TRAJECTORY FOR ADDITION AND SUBTRACTION

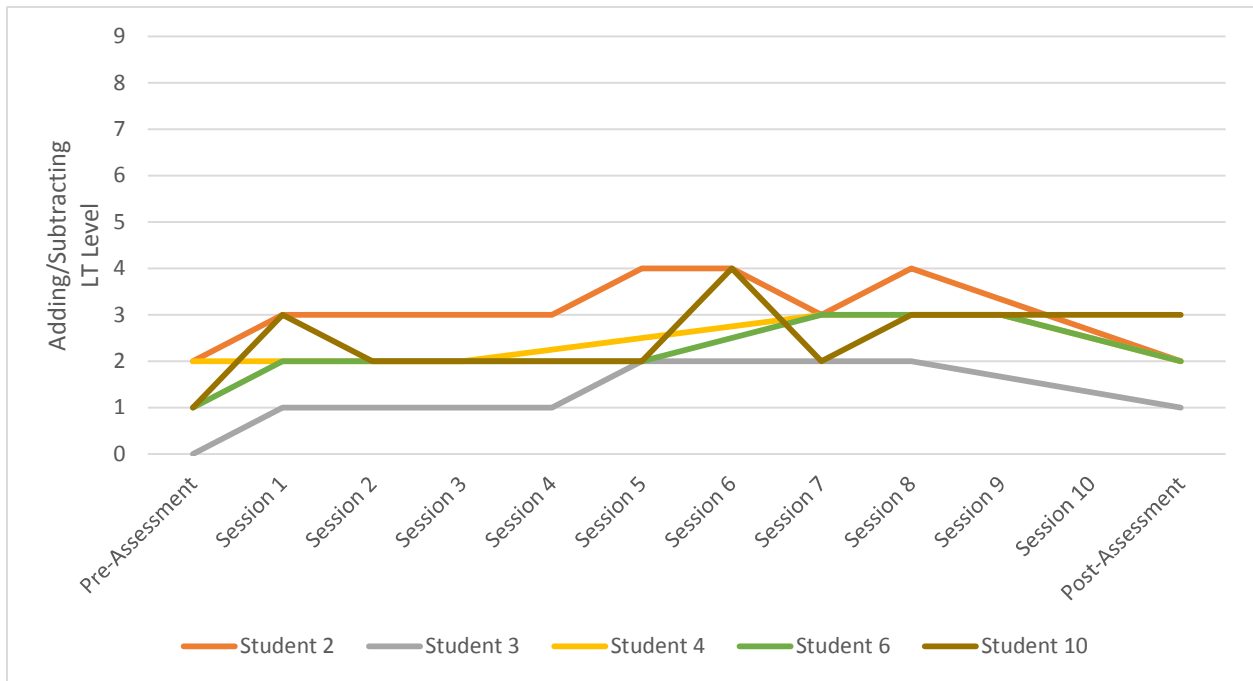

Figure D-2. For children who advanced only one or two levels at some point in instruction, Adding/Subtracting LT levels for Pretest, Each Instructional Session, and the Posttest, for the LT Group (note that some children participated in 9 or 10 sessions). Levels, defined in Figure 1, are 1–Small Number +/-, 2–Find Result +/-, 3–Find Change +/-, 4–Counting Strategies +/-, 5–Part-Whole +/-, 6–Numbers-in-Numbers +/-, 7–Deriver +/-, and 8–Problem Solver +/-.
